# Supplementary material
Source: PubMed Central journal article supplement (PMC1914102)

Peng\_ Supplemental Fig.1

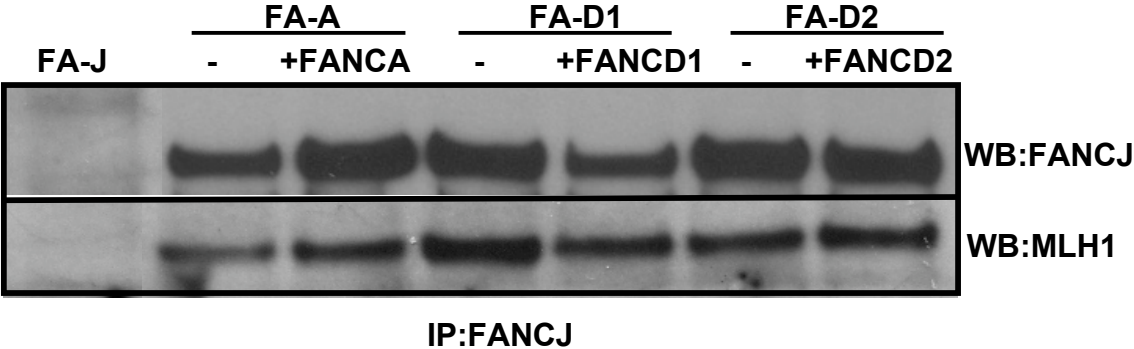

Supplement: 7601754s1.pdf [file 7601754s1.pdf]

Peng\_ Supplemental Fig.2

A

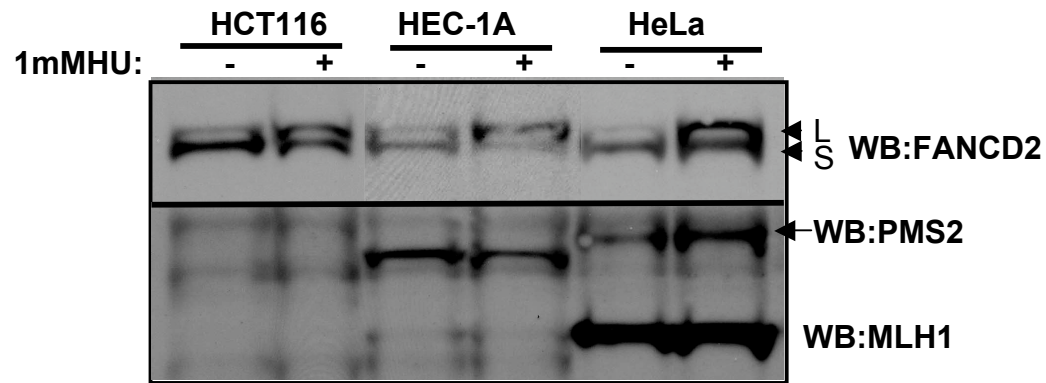

B

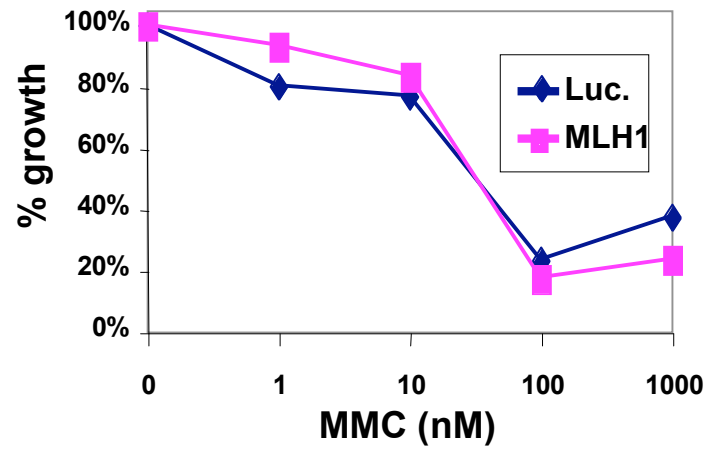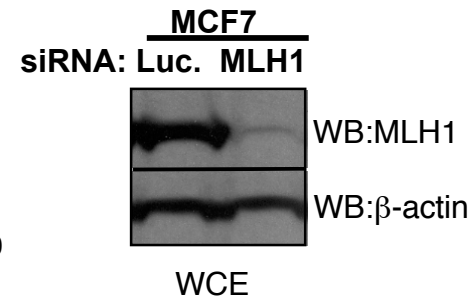

Supplement: 7601754s2.pdf [file 7601754s2.pdf]

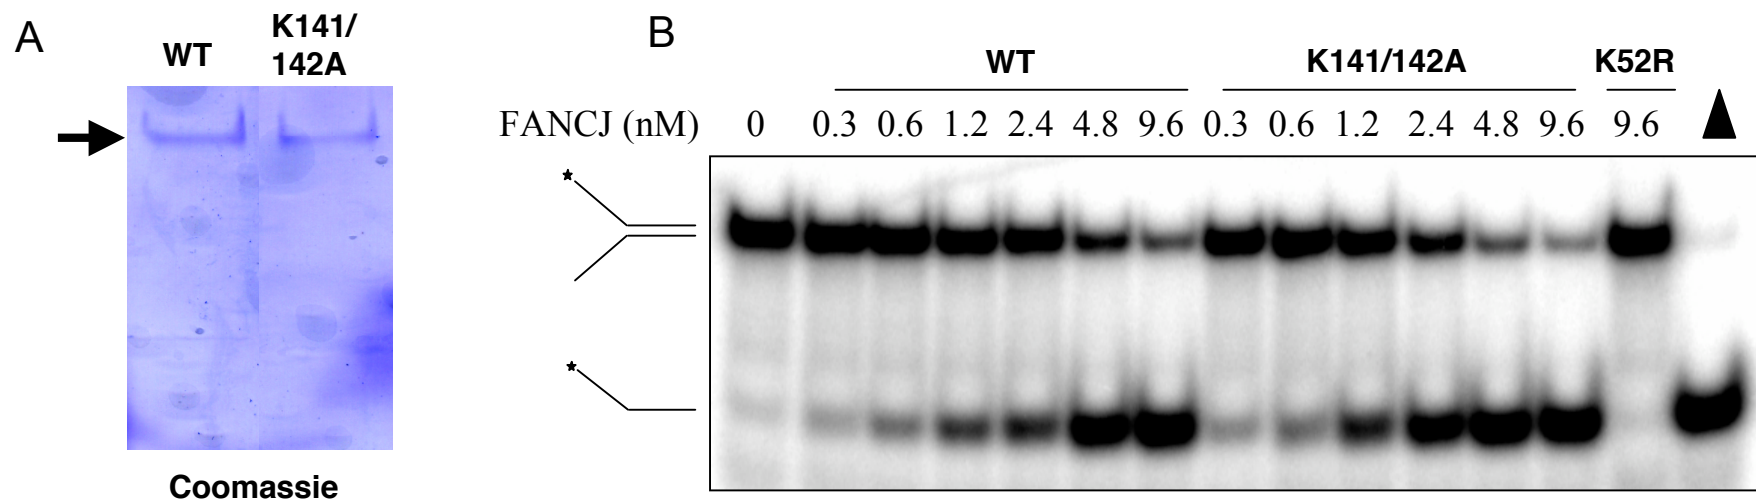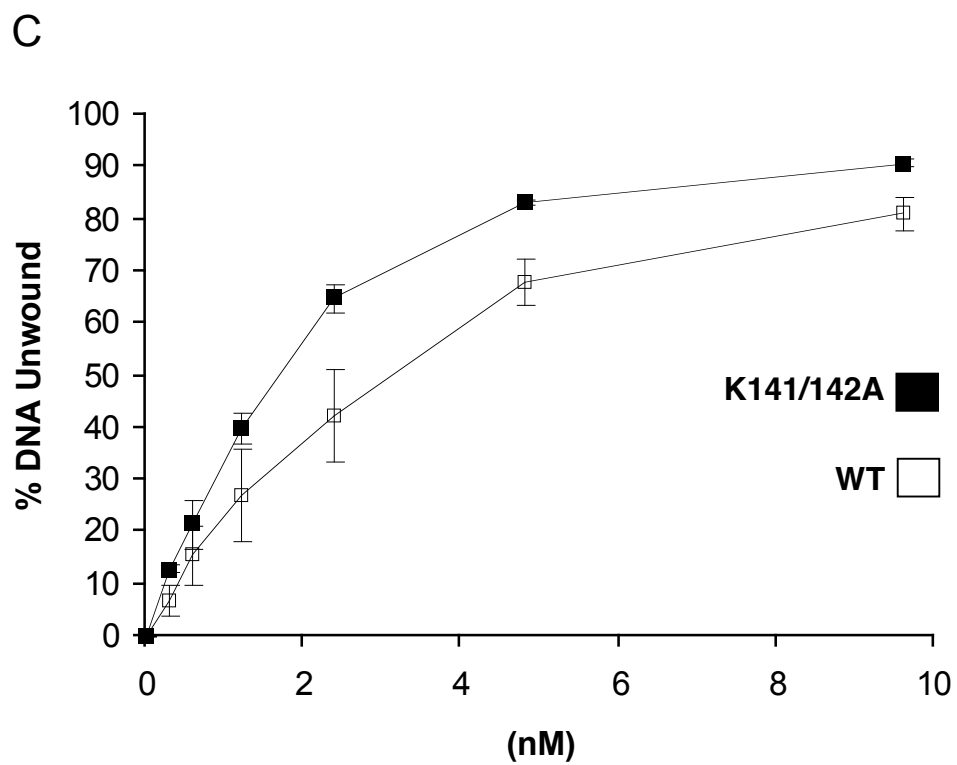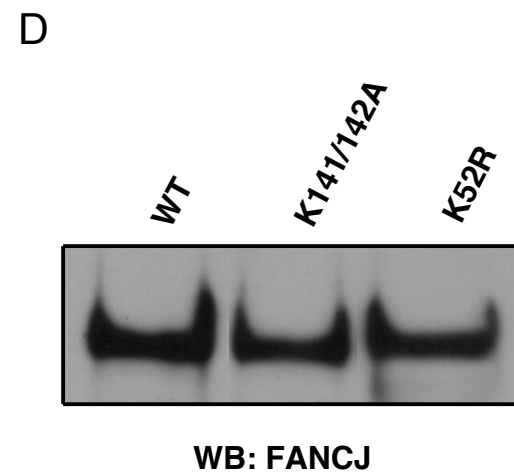

Supplement: 7601754s3.pdf [file 7601754s3.pdf]
